# Supplementary material for: The effect of landscape on functional connectivity and shell shape in the land snail Humboldtiana durangoensis
Source: PeerJ journal article supplement (doi:10.7717/peerj.9177), 2020-05-20

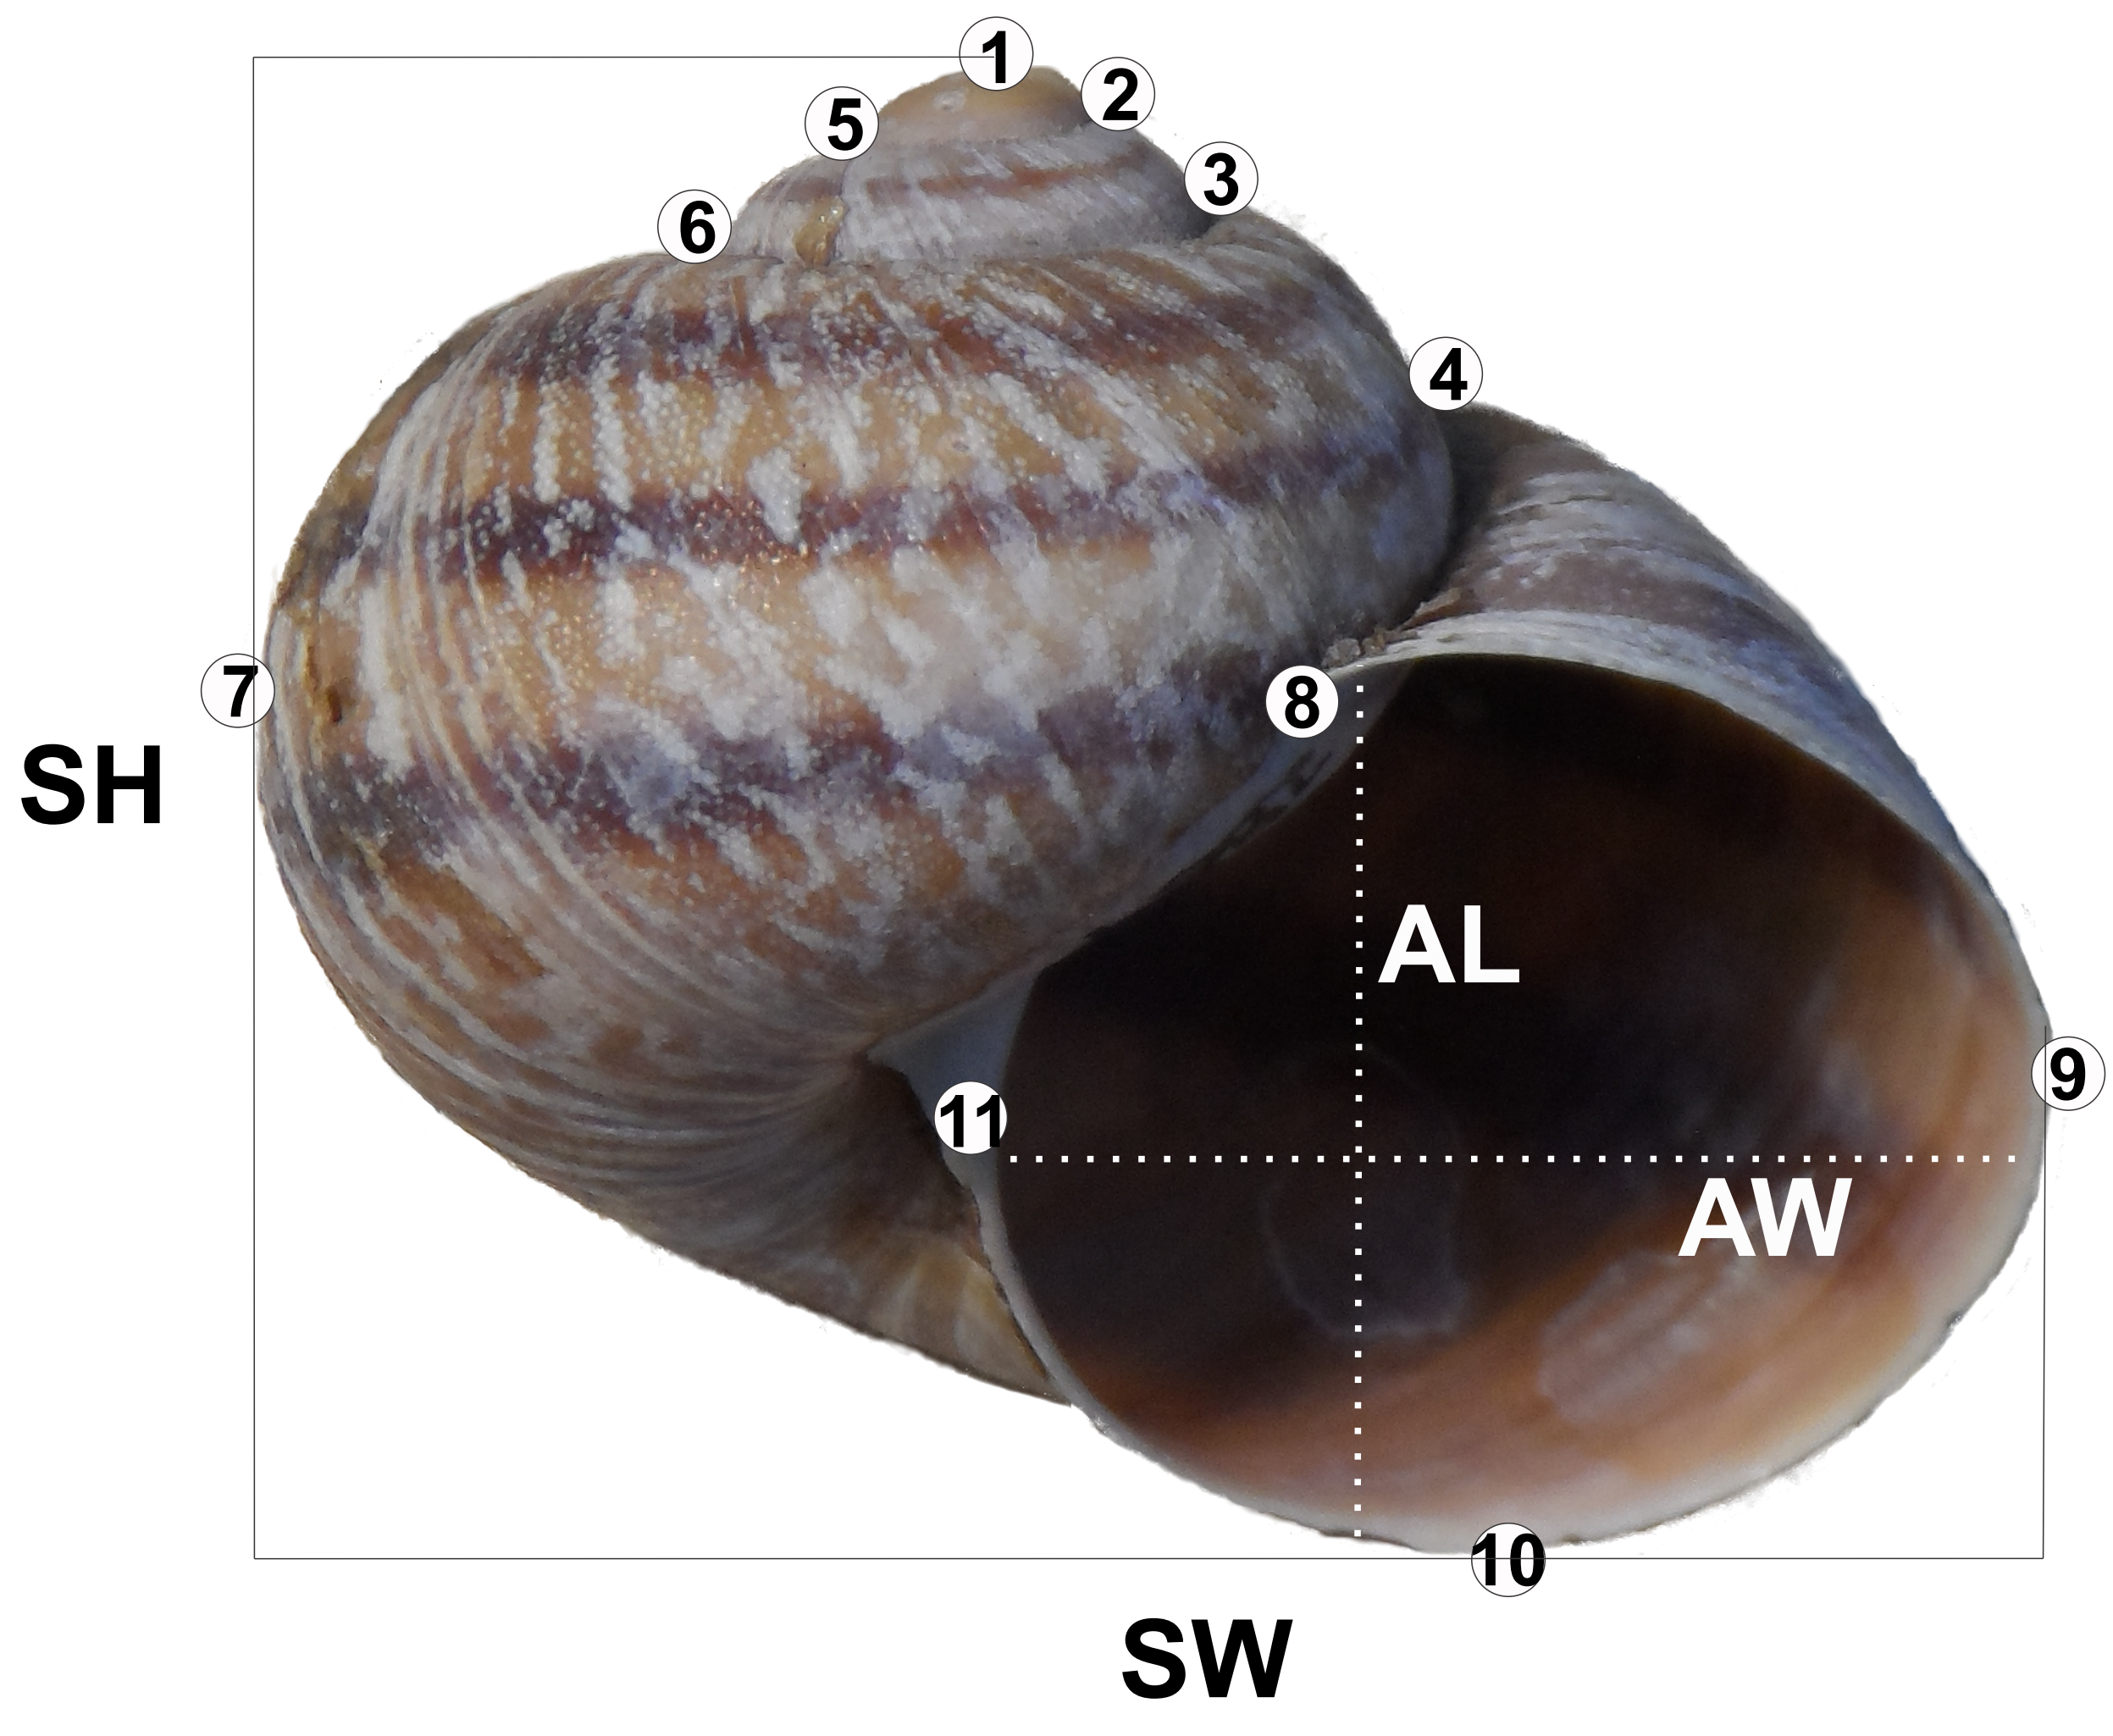

Supplement: Fig_S1.pdf [file Fig_S1.pdf]
